## **Host-cell interactions and innate immune response to an enteric pathogen in a human intestinal enteroid-neutrophil co-culture**

Jose M. Lemme-Dumit,<sup>1</sup> Michele Doucet,<sup>2</sup> Nicholas C. Zachos,<sup>2\*</sup> Marcela F. Pasetti<sup>1\*</sup>

<sup>1</sup>Department of Pediatrics, Center for Vaccine Development and Global Health, University of Maryland School of Medicine, Baltimore, MD, USA.

<sup>2</sup>Department of Medicine, Division of Gastroenterology and Hepatology, Johns Hopkins University School of Medicine, Baltimore, MD, USA.

\*Corresponding authors:

Marcela F. Pasetti, Ph.D.  
685 West Baltimore St.; HSF-I Room 480  
Baltimore, MD 21201  
Email: [mpasetti@som.umaryland.edu](mailto:mpasetti@som.umaryland.edu)  
Phone: 410-706-2341; Fax: 410-706-6205

Nicholas C. Zachos, Ph.D.  
720 Rutland Avenue; Ross Research Building Room 943  
Baltimore, MD 21205  
Email: [nzachos1@jhmi.edu](mailto:nzachos1@jhmi.edu)  
Phone: 410-614-0128; Fax: 410-955-9677

1 **Abstract**

2

3 Polymorphonuclear neutrophils (PMN) respond to inflammation and infection in the gut. The  
4 physical and molecular interactions between the human intestinal epithelium and PMN in the gut  
5 mucosa and their coordinated responses to enteric pathogens, are poorly understood. We have  
6 established a PMN-enteroid co-culture model consisting of human intestinal stem-cell derived  
7 enteroid monolayers and peripheral blood PMN. The model was characterized in terms of tissue  
8 structure, barrier function, cell phenotype, production of cytokines, and innate immune responses.  
9 *Shigella* was used as a model enteric pathogen to interrogate PMN and epithelial cell interactions  
10 and innate immunity. PMN added to the enteroid monolayers increased production of IL-8 and  
11 rapidly transmigrated across the epithelial cell layer. PMN immune phenotype was distinctly  
12 modified in the gut microenvironment via molecular signals and direct epithelial cell contact. Apical  
13 exposure to *Shigella* increased PMN migration and production of IL-6 by co-cultured cells. PMN  
14 became activated and efficiently phagocytosed bacteria at the apical epithelial cell surface. The  
15 co-culture model revealed PMN-epithelial cell direct communication, tissue-driven PMN  
16 phenotypic adaptation and enhancement of anti-microbial function. This novel *ex vivo* epithelial  
17 cell-PMN co-culture system is relevant for mechanistic interrogation of host-microbe interactions  
18 and innate immune responses and the evaluation of preventive/therapeutic tools.

19

20

## 21 **Introduction**

22 The intestinal epithelium creates a physical and molecular barrier that protects the host from  
23 potentially damaging elements in the constantly changing outside environment. Epithelial barrier  
24 function is supported by a diverse population of underlying immune cells, which deploy a variety  
25 of host-defense mechanisms against harmful agents.<sup>1</sup> Coordinated signals resulting from  
26 microbial sensing, cell-to-cell contact, cytokines, and other chemical mediators determine the type  
27 and extent of responses of immune cells in the gut mucosa, balancing tissue homeostasis with  
28 effective anti-microbial function via inflammation.

29 Advances in understanding intestinal physiology, pathophysiology, and host immunity have  
30 traditionally relied on studies conducted in animal models (or animal tissue) and in traditional  
31 tissue culture systems using colon cancer cell lines. Animal models, including the use of mutant  
32 mouse strains, have contributed to the mechanistic understanding of the composition, function,  
33 regulatory processes, and operatives of immunity at the gut mucosa. Unfortunately, host  
34 restrictions limit the utility and value of animal models.<sup>2, 3</sup> This is the case for many enteric  
35 pathogens for which small animals fail to recreate disease as it occurs in humans. Likewise,  
36 immortalized (transformed) cell lines (e.g. HT-29, Caco-2, and T84) do not reflect human  
37 physiological responses but the behavior of aberrant diseased cells (e.g. karyotype defects).  
38 These cell-line based cultures also lack the multicellular complexity of the human intestinal  
39 epithelium, which further reduces the reliability and significance of the data generated.

40 The establishment of human enteroids from Lgr5<sup>+</sup> intestinal stem cells was a breakthrough in  
41 tissue culture technology.<sup>4</sup> Since then, three-dimensional (3D) intestinal enteroids have been  
42 widely used as models to study human gut physiology and pathophysiology as well as host-  
43 microbe interactions.<sup>5-7</sup> Not only do enteroids render a truer physiological representation of the  
44 human epithelium, but they also offer a practical and reliable system to probe mechanisms and  
45 interventions at the gut mucosal interface. The 3D spheroid conformation can be adapted to  
46 produce a 2D monolayer configuration with enteroids seeded on a semipermeable membrane

47 (i.e. Transwell insert).<sup>8-10</sup> An important practical advantage to this simplified format is that it allows  
48 for direct and controlled access to the apical (mimicking the lumen) and basolateral side of the  
49 epithelial cells, thus facilitating experimental manipulation and evaluation of outcomes. These  
50 enteroid monolayers, which can be generated from any gut segment, reproduce the  
51 undifferentiated (crypt-like) and differentiated (villus-like) profile of the intestinal epithelial cells  
52 (i.e. absorptive enterocytes, goblet cells, enteroendocrine cells, and Paneth cells) and display  
53 segment-specific phenotypic and functional attributes of the normal human gut.<sup>11</sup> To better  
54 recreate the cellular complexity of the gastrointestinal mucosal barrier, we devised a co-culture  
55 consisting of enteroid monolayers and human primary macrophages on the basolateral side.<sup>12, 13</sup>  
56 The enteroid-macrophage co-culture model allowed us to demonstrate physical and  
57 cytokine/chemokine-mediated interactions between intestinal epithelial cells and macrophages in  
58 the presence of pathogenic *E. coli*. Aiming to improve and expand this model to examine the role  
59 of other phagocytic cells in gut mucosal immunity, we herein report the establishment of an *ex*  
60 *vivo* co-culture model containing intestinal epithelial cells and human primary polymorphonuclear  
61 neutrophils (PMN) facing the monolayers' basolateral side. This co-culture model was  
62 characterized by analysis of histology, PMN phenotype, PMN-epithelial cell physical and  
63 molecular interactions and cell function. Coordinated epithelial and PMN anti-microbial response  
64 was examined using *Shigella* as model enteric pathogen. *Shigella* causes diarrhea and dysentery  
65 in humans by trespassing the colonic barrier via M cells and infecting epithelial cells, and this  
66 process involves massive recruitment of PMN.<sup>14</sup> The enteroid-PMN co-culture modeled the  
67 paradoxical role of PMN contributing to inflammation and controlling infection.

68

## 69 **Results**

70 **Establishment of a PMN-enteroid co-culture and PMN-epithelial cell interaction.** To model  
71 PMN function in the human gut, we established an enteroid-PMN co-culture model that contains  
72 human enteroid monolayers and freshly isolated human PMN. The configuration of this model is

73 similar to that of the human enteroid-macrophage co-culture developed by our group.<sup>12, 13</sup> Human  
74 ileal 3D organoids derived from Lgr5<sup>+</sup>-containing biopsies from healthy subjects were seeded  
75 upon the inner (upper) surface of a Transwell insert and allowed to grow until they reached  
76 confluency. PMN isolated from peripheral blood of healthy human adult volunteers, exhibiting a  
77 CD15<sup>+</sup>CD16<sup>+</sup>CD14<sup>-</sup> phenotype were seeded on the outer (bottom) surface of the insert (Fig. 1a).<sup>15</sup>  
78 Confocal immunofluorescence microscopy and H&E staining of the PMN-enteroid co-cultures  
79 confirmed the expected epithelial cell polarity with the brush border oriented towards the luminal  
80 side (apical compartment) and adherent PMN facing the basolateral side of the monolayer (Fig.  
81 1b). A striking observation was the rapid mobilization of PMN from the bottom side of the insert  
82 (where they were seeded) towards the epithelium. Within 2h of being added to the monolayers,  
83 PMN migrated from the insert and through the insert's pores, and intercalated within the epithelial  
84 cells (Fig. 1b, c). Further, PMN crossed through the epithelial monolayer and erupted on the apical  
85 surface (Fig. 1c). The process created a hole in the otherwise confluent epithelium. The migrating  
86 PMN could be enumerated in the apical compartment media (Fig. 1d). The addition of PMN  
87 increased membrane permeability, shown as decrease in transepithelial electrical resistance  
88 (TER), although the difference did not reach statistical significance (Fig. 1e).  
89 Since cell movement is influenced by molecular mediators, we next examined the presence of  
90 cytokines (pro- and anti-inflammatory) and chemoattractant molecules in media collected from  
91 the apical and basolateral compartments of enteroid monolayers alone and enteroid-PMN co-  
92 cultures. Basolateral levels of IL-8 were 10-fold higher in the enteroid-PMN co-cultures (Fig. 1f),  
93 while MCP-1 and TNF- $\alpha$  remained unaffected. The presence of PMN did not affect apical  
94 secretion of MCP-1, IL-8 and TNF- $\alpha$  (Fig. 1f). Production of MCP-1 was distinctly polarized, with  
95 higher levels being released to the apical side. IL-1 $\beta$ , IL-6, IL-10, IL-12p70, IFN- $\gamma$ , and TGF- $\beta$ 1  
96 were measured but found to be non-detectable.

97 Because human IL-8 promotes PMN migration,<sup>16</sup> we examined the effect of exogenous IL-8 on  
98 the co-cultured PMN and on monolayer permeability. Apical treatment of monolayers with 100  
99 ng/ml rhIL-8 increased PMN migration (1.8-fold) (Fig. 1g) and barrier permeability; the previously  
100 observed PMN-induced decrease in TER became statistically significant in the presence of IL-8  
101 (Fig. 1h). IL-8 alone did not affect the permeability of monolayers. Taken together, these results  
102 demonstrate adequate engraftment of PMN on the basolateral side of the enteroid monolayer,  
103 rapid migration of PMN across the monolayer (moving to the luminal side), PMN-induced  
104 basolateral secretion of IL-8, and membrane de-stabilization (increased permeability) by IL-8-  
105 enhanced PMN transepithelial movement.

106

107 **The human intestinal epithelium environment determines PMN immune phenotype and**  
108 **functional capacity.** Cell phenotype, morphology, and function can be affected by the  
109 surrounding tissue and molecular environment. We hypothesized that the immune phenotype and  
110 functional capacity of PMN added to the enteroid monolayer would be influenced by their proximity  
111 or direct contact with the intestinal epithelium. To explore this hypothesis, we investigated the  
112 expression of cell surface markers and phenotypic features of PMN freshly isolated from  
113 peripheral blood in comparison with those of PMN in the enteroid co-culture; two populations of  
114 co-cultured PMN were investigated following 2h of incubation: PMN harvested from the  
115 basolateral media (tissue adjacent milieu) or PMN residing within the monolayer and in direct  
116 contact with the epithelial cells (Fig. 2a). PMN co-cultured with enteroid monolayers had a distinct  
117 phenotypic profile as compared with peripheral blood PMN. Regardless of the location, PMN co-  
118 cultured with enteroid monolayers exhibited increased expression of CD18 ( $\beta 2$  integrin), a  
119 molecule that participates in extravasation of circulating PMN, and CD47, a receptor for  
120 membrane integrins involved in cell adhesion and migration (Fig. 2b). In contrast, the expression  
121 of CD182 (CXCR2 or IL-8RB) was reduced in co-culture PMN (Fig. 2b). CD66b, a marker of  
122 secondary granule exocytosis and CD88 (C5a receptor), a molecule that mediates chemotaxis,

123 granule enzyme release, and super anion production were likewise increased, although only in  
124 PMN in the basolateral media (not in contact with cells) (Fig. 2c). PMN in close contact with  
125 epithelial cells exhibited increased expression of CD15 (E-selectin), which mediates PMN  
126 extravasation; CD16 (Fc $\gamma$ RIII), a receptor for IgG that mediates degranulation, phagocytosis, and  
127 oxidative burst; and CD11b ( $\alpha$  integrin), a protein that facilitates PMN adhesion and, along with  
128 CD18, forms the Mac-1 complex implicated in multiple anti-microbial functions (e.g. phagocytosis,  
129 cell-mediated cytotoxicity, cellular activation) (Fig. 2d). These results demonstrate unique  
130 phenotypic adaptations of PMN within the intestinal epithelial environment, some of which were  
131 driven by molecular signals while others required direct PMN-epithelial cell contact.

132

133 **PMN interaction with *Shigella* as a model enteric pathogen.** To study PMN and epithelial cell  
134 interactions in the context of an enteric infection, we used wild type *Shigella flexneri* 2a (strain  
135 2457T) as a model pathogen. PMN participate in *Shigella* pathogenesis through secretion of pro-  
136 inflammatory cytokines and deploy anti-microbial functions including phagocytosis, proteolytic  
137 enzymes, anti-microbial proteins, and neutrophil extracellular trap (NET) production. We first  
138 determined baseline responses of PMN exposed to *Shigella*. PMN phagocytosed FITC-labeled  
139 wild-type *S. flexneri* 2a within 10 min of exposure; bacterial uptake increased over time (up to 1h)  
140 reaching a maximum effect at 30 min (Fig. 3a). In parallel, the number of bacteria in the culture  
141 supernatant of PMN-*Shigella* decreased significantly within 30- and 60-min exposure, in  
142 comparison to culture supernatant of *Shigella* alone, in the absence of PMN (Fig. 3b). The  
143 proportion of viable PMN was not affected during the first 2h, but decreased significantly 3h post  
144 infection (Fig. 3c). *Shigella*-exposed PMN exhibited changes in cell morphology and motility;  
145 formation of pseudopodia (projections of the cell membrane that enables locomotion) was  
146 observed within 30 min post infection (Fig. 3d). PMN displayed dynamic amoeboid motility toward  
147 the bacteria, and release of NETs (Fig. 3e). FITC-stained *Shigella* colocalized with

148 phagolysosome (Fig. 3f). PMN supernatants 2h post infection revealed increased production and  
149 secretion of IL-8 and IL-1 $\beta$ , which are key molecular mediators of *Shigella* pathogenesis, as well  
150 as downregulation of IL-6 and MCP-1. TNF- $\alpha$  was not affected (Fig. 3g). IL-10, TGF- $\beta$ 1, and IFN-  
151  $\gamma$  were also measured but were below the limit of assay detection. These results revealed that  
152 PMN anti-microbial function against *Shigella* involved morphological changes, phagocytic activity,  
153 and modulation of inflammatory cytokines.

154

155 **Cellular and molecular responses to *Shigella* in the PMN-enteroid co-culture model.** We  
156 used the human PMN-enteroid co-culture model to interrogate PMN and epithelial cell interactions  
157 and coordinated responses to *Shigella*. PMN-enteroid co-cultures were produced as described  
158 above (Fig. 1a), allowed to settle for 2h, and then apically exposed to wild type *S. flexneri 2a*  
159 (MOI=10) for 2h. Non-exposed co-cultures served as controls. Consistent with our previous  
160 observation, PMN facing the basolateral side of the cells moved swiftly through the filter pores,  
161 passed through the epithelial cells, and protruded on the apical side of the monolayer. PMN  
162 basolateral-apical transmigration increased in the presence of *Shigella* (Fig. 4a). PMN traversing  
163 across the monolayer phagocytosed bacteria as evidenced by confocal fluorescent microscopy  
164 (Fig. 4b; CD16<sup>+</sup> PMN are stained in green, engulfed *S. flexneri 2a* in red; actin in white). Addition  
165 of PMN to the enteroid monolayers enabled *Shigella* to reach the basolateral side, whereas alone,  
166 *Shigella* was unable to trespass the intact enteroid (Fig. 4c). Reduced (1.3-fold) TER values were  
167 observed in the *Shigella*-exposed PMN-co-culture as compared with *Shigella*-exposed  
168 monolayers alone (Fig. 4d), consistent with loss of barrier function and tissue damage that allowed  
169 bacterial translocation.

170 We next examined cytokines produced by *Shigella*-infected and non-infected PMN-enteroid co-  
171 cultures. MCP-1, TNF- $\alpha$ , and IL-8 were detected apically and basolaterally, as described above.  
172 *Shigella* infection resulted in reduced production of MCP-1 and TNF- $\alpha$  apically as well as



173 increased production of IL-6 and substantially reduced secretion of IL-8 basolaterally (Fig. 4e).  
174 IL-6 was only detected in infected cultures and exhibited basolateral polarization (Fig. 4e).  
175 Cultures were also tested for presence of IL-1 $\beta$ , which along with IL-8, are hallmarks of *Shigella*  
176 pathogenesis, but was not detectable. Collectively, these observations demonstrate that *Shigella*  
177 infection causes active recruitment of PMN to the luminal side, which results in discernible  
178 damage of the enteroid monolayer that enables *Shigella* penetration and basolateral infection;  
179 still PMN actively engulfed bacteria and increased production of inflammatory cytokines on the  
180 apical and basolateral sides, respectively.

181  
182 **Exposure of PMN-enteroid co-cultures to *Shigella* changes PMN immune phenotype.** We  
183 next examined phenotypic markers of PMN co-cultured with epithelial cells before and after  
184 exposure to *Shigella* by flow cytometry. PMN in the infected co-cultures exhibited increased  
185 expression of CD88, CD47, and CD66b as compared with non-infected co-cultures (Fig. 5a).  
186 Expression of CD15 and CD18, on the other hand, was decreased on PMN from *Shigella*-infected  
187 co-cultures (Fig. 5b). CD16, CD11b, and CD182, remained unchanged (Fig. 5c). These results  
188 suggest that PMN residing in the intestinal environment undergo immune phenotypic changes as  
189 a result of pathogen exposure consistent with increase anti-microbial function.

## 190 191 **Discussion**

192 Epithelial cells and innate phagocytic cells underlying the intestinal epithelium work synergistically  
193 preventing the trespassing of harmful agents and deploying rapid and effective host defense  
194 mechanisms against pathogens. PMN are the first innate immune cells recruited in response to  
195 gastrointestinal tissue inflammation and infection and they play a critical role in innate immune  
196 responses.<sup>17</sup> Patients with PMN disorders are prone to recurrent microbial infection.<sup>18, 19</sup> Here, we  
197 successfully established an *ex vivo* primary human intestinal epithelial and PMN co-culture and

198 used of this model to interrogate cell interactions and innate responses to *Shigella* as a model  
199 enteric pathogen.

200 Our group developed the first *ex vivo* human co-culture of enteroids and monocyte-derived  
201 macrophages in a monolayer format.<sup>12, 13</sup> The same approach was used to produce the enteroid-  
202 PMN co-culture described herein. Differently from macrophages, which remained in the  
203 basolateral side of the monolayer (where seeded) and responded to luminal organisms by  
204 extending transepithelial projections between epithelial cells, PMN rapidly migrated from the  
205 basolateral side of the epithelial cell and across the monolayer, exiting through the apical surface.  
206 Histological and confocal microscopy images revealed PMN crawling through the Transwell insert  
207 pores, embedding at the base of the epithelial cells, and bursting off the apical side of the enteroid  
208 monolayer, all within a few hours of co-culture. While macrophages contributed to cell  
209 differentiation and stabilized the epithelial barrier in our previous studies, the PMN transmigration  
210 observed herein resulted in functional increase in barrier permeability that enabled bacteria  
211 invasion. Intestinal epithelial repair events (e.g. cell proliferation and migration, and closure of  
212 leaking epithelial lateral spaces) reportedly begin minutes after acute mucosal barrier injury.<sup>20</sup> As  
213 a corollary of this study, we are investigating tissue healing subsequent to PMN-induced  
214 inflammation and cell disruption, and the mechanisms and elements involved.

215 The capacity of PMN to migrate across the vascular endothelium<sup>21</sup> and a variety of tissues<sup>22, 23</sup>  
216 and epithelial cell layers<sup>24-27</sup> has been documented *in vivo* (mainly in animal models) or *in vitro*  
217 using cell lines. These processes have been associated with PMN activation as a result of  
218 microbial sensing, inflammation, or danger signals. The level of myeloperoxidase (MPO) in stool  
219 is, in fact, a maker of inflammatory bowel disease severity.<sup>28</sup> In our human primary PMN and  
220 intestinal epithelial cells co-culture model, PMN migrated even in the absence of external  
221 stimulatory signals. PMN are not typically present in the homeostatic gut (but actively recruited  
222 by signs of inflammation or infection);<sup>29</sup> therefore, unprovoked PMN migration would not be  
223 expected.

224 The tissue microenvironment can influence immune cell phenotype and effector function.<sup>30, 31</sup> Our  
225 results thus suggest that PMN activation in the co-culture was triggered by tissue-derived signals.  
226 PMN from peripheral blood exhibited rapid phenotypic changes when incubated with enteroid  
227 monolayers. Compared to the PMN from peripheral blood, PMN co-cultured with epithelial cells  
228 had increased expression of CD18, which favors cell binding and CD47, which supports  
229 transmigration across endothelial and epithelial cells.<sup>32-34</sup> Their phenotype was also influenced by  
230 their specific location, whether they were in direct contact with epithelial cells or simply exposed  
231 to basolateral culture media. PMN in close proximity with the enterocytes (the migratory ones)  
232 had upregulated expression of CD15, which participates in chemotaxis and extravasation from  
233 circulation, as well as Fc $\gamma$ RIII (CD16), a low affinity Fc receptor for IgG, and CD11b, a marker of  
234 cell adhesion and anti-microbial function (phagocytosis, degranulation, oxidative burst).<sup>35, 36</sup> PMN  
235 in the basolateral media, on the other hand, had increased expression of CD66b and C5aR  
236 (CD88), indicative of functional activity and typically associated with degranulation and  
237 chemotaxis, respectively. This is to our knowledge the first detailed description of dynamic  
238 changes of PMN immune phenotype in a translationally relevant model of the human intestinal  
239 epithelium.

240 MCP-1/CCL2, a chemoattractant and enhancer of bacterial killing and survival of phagocytic cells  
241 and IL-8, a potent promoter of PMN migration and tissue infiltration,<sup>37, 38</sup> were abundantly  
242 produced by the ileal monolayers in our co-culture model. TNF- $\alpha$ , a recruiter and activator of  
243 phagocytic cells<sup>39</sup> was also present, albeit at lower levels. IL-8 was further sourced by the PMN  
244 added to the co-culture, which likely enhanced PMN transmigration. Likewise, the cytokine  
245 profiles revealed differences in macrophage and PMN innate immune function within the co-  
246 culture; while macrophages contributed to high levels of IFN- $\gamma$  and IL-6, these cytokines were not  
247 detected in the PMN co-culture. The model was therefore capable of reflecting structural and  
248 functional cell adaptation.

249 Human intestinal enteroids can be infected with *Shigella*.<sup>40, 41</sup> *In vivo*, the bacteria invade the  
250 colonic and rectal mucosa and causes severe inflammation, massive recruitment of PMN, and  
251 tissue destruction.<sup>14</sup> Bloody/mucous diarrhea (dysentery) with large numbers of PMN in stool are  
252 hallmarks shigellosis in humans.<sup>42</sup> Hence *Shigella* infection was fitting to interrogate coordinated  
253 innate responses of co-cultured epithelial cells and PMN to an enteric pathogen. *Shigella* added  
254 on the luminal surface of the monolayers increased basolateral-apical PMN migration. Early efflux  
255 of PMN into the colonic tissue has been observed during shigellosis in the infected rabbit loop  
256 model.<sup>43</sup> PMN transmigration has also been reported *in vitro* using colonic T84 cells.<sup>43, 44</sup>  
257 Consistent with previous reports, PMN transmigration in our co-culture caused microscopically  
258 visible epithelial cell damage and created a conduit for bacterial invasion and possibly  
259 amplification of infection. We are currently studying reverse transmigration of bacteria-loaded  
260 PMN (out of the lumen and back to the basolateral side) as a possible means to initiate adaptive  
261 immunity through cross-presentation.  
262 Although acting in a “brute force” manner, PMN deployed potent anti-microbial activity against  
263 *Shigella*. Bacteria incubated with PMN from circulation were phagocytosed within minutes and  
264 entrapped in NET structures. These PMN increased production of IL-8 and the pyroptosis-inducer  
265 IL-1 $\beta$ , and downregulated IL-6 and MCP-1. Larger numbers of PMN transmigrated to the apical  
266 compartment in the *Shigella*-infected co-culture and had robust phagocytic capacity. Intriguingly,  
267 IL-8 levels were reduced, IL-1 $\beta$  was absent, and IL-6 was increased in the infected (compared to  
268 non-infected) PMN co-culture. A reduction of IL-8 production had been reported in *Shigella*-  
269 infected human colonic explants, which was ascribed to anti-inflammatory bacterial proteins or  
270 death of IL-8 secreting cells.<sup>45</sup> Reduced levels of these inflammatory cytokines may also reflect a  
271 regulatory role to prevent further tissue damage. Heightened levels of IL-6 and reduced TNF- $\alpha$   
272 during infection may suggest a protective epithelial mechanism after injury.<sup>46, 47</sup> In addition, IL-6

273 has been attributed a beneficial role in enhancing Th17-protective immunity against *Shigella* re-  
274 infection.<sup>48</sup>

275 The immune phenotype of PMN in the co-culture adapted again as a result of *Shigella* infection,  
276 with further increases in activation/granule-associated markers CD66b, CD88, and CD47. CD47  
277 has been implicated in PMN paracellular migration through epithelial cells in response to  
278 bacterium-derived leukocyte chemoattractant N-formyl-methionyl-leucyl-phenylalanine, in a  
279 process that involved intracellular distribution and increased CD47 cell surface expression.<sup>33</sup>  
280 CD47-deficient mice have increased susceptibility to *E. coli* as a result of reduced PMN trafficking  
281 and bacterial killing activity.<sup>49</sup> This finding is consistent with our observed upregulation of CD47  
282 in *Shigella*-exposed PMN, which is likely associated with PMN's antimicrobial activity. CD16 and  
283 CD11b expression were unaltered on PMN co-cultured with intestinal enteroids and exposed to  
284 *Shigella*, indicating a preserved phagocytic capacity, whereas extravasation and cell adhesion  
285 markers CD15 and CD18 were downregulated. It has been reported that CD47 expression  
286 increases gradually and modulates CD11b-integrin function and CD11b/CD18 surface expression  
287 on PMN, suggesting a regulatory mechanism between these molecules.<sup>33, 50</sup> Expression of CD47  
288 is self-protective; it avoids clearance by phagocytic cells.<sup>51</sup> The exact role of CD47 expression on  
289 PMN during *Shigella* infection remains to be elucidated.

290 Human intestinal xenografts in immunodeficient mice have been used to model interactions of  
291 *Shigella* with the human intestine *in vivo*. The model failed to discern any role of PMN in  
292 ameliorating or exacerbating disease, but revealed larger intracellular bacteria in PMN-depleted  
293 mice; the authors conclude that while PMN may contribute to tissue damage, they are important  
294 in controlling bacteria dissemination. The combination of species, immunodeficient background,  
295 and impracticality are major confounders/limitations of this model.<sup>52</sup>

296 The PMN-epithelial cell co-culture described here provides a translationally relevant *ex vivo* model  
297 to study human epithelial cell-PMN physiology and pathophysiology, as well as host cell  
298 interactions and innate responses to enteric organisms. Our studies provided new insights on the

299 close communication between PMN and epithelial cells and their coordinated responses to  
300 *Shigella* as a model gastrointestinal pathogen. These studies also contributed new knowledge on  
301 the ability of the human gut environment to induce phenotypic and functional changes on recruited  
302 PMN. This model could be useful to interrogate innate immune defense mechanisms to enteric  
303 pathogens and to support the development and evaluation of preventive or therapeutic tools.

304

## 305 **Materials and methods**

### 306 **Human PMN isolation**

307 Human peripheral blood was collected in EDTA tubes (BD Vacutainer) from healthy volunteers  
308 enrolled in University of Maryland Institutional Review Board (IRB) approved protocol #HP-40025-  
309 CVD4000, and methods were conducted in compliance with approved Environmental Health and  
310 Safety guidelines (IBC #00003017). PMN were obtained by Ficoll-Paque (PREMIUM solution, GE  
311 Healthcare Bio-Sciences AB, Sweden) gradient centrifugation following dextran (Alfa Aesar, USA)  
312 sedimentation.<sup>53</sup> Contaminating erythrocytes were removed by hypotonic lysis. After washing,  
313 cells (>95% of PMN determined by flow cytometry and May-Grunwald-Giemsa stained cytopreps)  
314 were suspended in enteroid differentiation media (DFM) without antibiotics and immediately used.  
315 Cell counting and viability were determined using Guava Viacount Flex Reagent (Luminex, USA)  
316 following the manufacturer's instruction and analyzed in Guava 8HT using Viacount software  
317 (Luminex, USA).

318

### 319 **Tissue collection and enteroid generation**

320 Human enteroid cultures were established from biopsy tissue obtained after endoscopic or  
321 surgical resection from healthy subjects at Johns Hopkins University under Johns Hopkins  
322 University IRB approved protocol #NA-00038329, as previously described.<sup>54</sup> Briefly, enteroids  
323 generated from isolated intestinal crypts from ileal segments were maintained as cysts embedded  
324 in Matrigel (Corning, USA) in 24-well plates and cultured in Wnt3A and Rspo-1 containing non-

325 differentiated media (NDM).<sup>55</sup> Multiple enteroid cultures were harvested with Culturex Organoid  
326 Harvesting Solution (Trevigen, USA), and small enteroid fragments were obtained by digestion  
327 with TrypLE Express (ThermoFisher) in 37°C water bath for 90 seconds. Enteroid fragments were  
328 resuspended in NDM containing 10  $\mu$ M Y-27632 and 10  $\mu$ M CHIR 99021 inhibitors (Tocris)  
329 (NDM+inhibitors). The inner surface of Transwell inserts (3.0  $\mu$ m pore transparent polyester  
330 membrane) pre-coated with 100  $\mu$ l of human collagen IV solution (34  $\mu$ g/ml; Sigma-Aldrich, USA)  
331 were seeded with 100  $\mu$ l of an enteroid fragment suspension, and 600  $\mu$ l of NDM+inhibitors was  
332 added to the wells of the receiver plate and incubated at 37°C, 5% CO<sub>2</sub> as previously described.<sup>55</sup>  
333 NDM without inhibitors were replaced after 48h, and fresh NDM was added every other day; under  
334 these conditions, enteroid cultures reached confluency in 14-16 days. Monolayer differentiation  
335 was induced by incubation in Wnt3A-free and Rspo-1-free DFM without antibiotics for 5 days.  
336 Monolayer confluency was monitored by measuring TER values with an epithelial voltohmmeter  
337 (EVOM<sup>2</sup>; World Precision Instruments, USA). The unit area resistances ( $\text{ohm}\cdot\text{cm}^2$ ) were  
338 calculated according to the growth surface area of the inserts (0.33  $\text{cm}^2$ ).

339

#### 340 **PMN-enteroid co-culture**

341 Differentiated enteroid monolayers seeded on Transwell inserts were inverted and placed into an  
342 empty 12-well plate. PMN ( $5\times 10^5$  in 50  $\mu$ l of DFM) were added onto the bottom surface of the  
343 inserts and cells were allowed to attach for 2h at 37°C, 5% CO<sub>2</sub> (inserts remained wet throughout  
344 this process). The inserts were then turned back to their original position into a 24-well receiver  
345 plate, and DFM was added to the insert (100  $\mu$ l) and into the well (600  $\mu$ l). Approximately 45% of  
346 the total PMN remained attached to the Transwell insert. TER measurements were collected after  
347 2h allowing monolayer recovering.

348

#### 349 ***Shigella flexneri* 2a infection**

350 *Shigella flexneri* 2a wild type strain 2457T was grown from frozen stocks (-80°C) on Tryptic Soy  
351 Agar (TSA) (Difco BD, USA) supplemented with 0.01% Congo Red dye (Sigma-Aldrich) overnight  
352 at 37°C. Bacterial inoculum was made by resuspending single red colonies in sterile 1X PBS pH  
353 7.4 (Quality Biological). Bacterial suspension was adjusted to the desired concentration (~1x10<sup>8</sup>  
354 CFU/ml) in advanced DMEM/F12 without serum. A bacterial suspension containing ~ 5x10<sup>6</sup> CFU  
355 in 50 µl was added directly to PMN (for 10-60 min) or to the apical compartment of enteroid  
356 monolayers alone or enteroid-PMN co-culture (for 2h) a multiplicity of infection of 10 relative to 1  
357 PMN.

358

### 359 **PMN transmigration**

360 Basolateral-to-apical PMN transmigration was quantified by measurement of PMN MPO using a  
361 commercial kit (Cayman Chemical, Ann Arbor, MI) as previously described.<sup>56</sup> The assay was  
362 standardized with a known number of human PMN. MPO activity in lysates of enteroid monolayer  
363 alone was negligible.

364

### 365 **PMN phagocytosis**

366 *S. flexneri* 2a cultures grown overnight as described above were washed, resuspended in sterile  
367 PBS and incubated with FITC (Sigma-Aldrich) (20 µg/ml) for 30 min at 37°C. The bacteria  
368 suspension was thoroughly washed and adjusted to ~10<sup>8</sup> CFU/ml in sterile PBS/glycerol (1:2),  
369 and stored at -80°C until used. The day of the assay, FITC-labeled *Shigella* was incubated with  
370 PMN-autologous human sera for 30 min at 37°C. Opsonized bacteria 5x10<sup>6</sup> CFU was added to  
371 PMN suspension (5x10<sup>5</sup> cells) and incubated for 10, 30, and 60 min. Phagocytosis was measured  
372 by flow cytometry. External fluorescence was blocked with the addition of trypan blue, and the  
373 difference between MFI blocked and non-blocked samples was used to calculate %  
374 phagocytosis.<sup>57, 58</sup>



375

### 376 **H&E and immunofluorescence staining**

377 PMN-enteroid co-culture cells were fixed in aqueous 4% paraformaldehyde (PFA; Electron  
378 Microscopy Sciences, USA) at room temperature (RT) for 45 min and then washed with PBS. For  
379 H&E staining, monolayers were kept for at least 48h in formaldehyde solution, then embedded in  
380 paraffin, sectioned, mounted on slides, and stained with H&E. For immunofluorescence, cells  
381 were permeabilized and blocked for 30 min at RT in PBS containing 15% FBS, 2% BSA, and  
382 0.1% saponin (all Sigma-Aldrich, USA). Cells were rinsed with PBS and incubated overnight at  
383 4°C with primary antibodies: mouse anti-CD16 (LSBio, USA), rabbit anti-*S. flexneri* 2a (Abcam,  
384 USA) diluted 1:100 in PBS containing 15% FBS and 2% BSA. Stained cells were washed with  
385 PBS and incubated with secondary antibodies: goat anti-mouse AF488, goat anti-rabbit AF594  
386 (all ThermoFisher, USA) diluted 1:100 in PBS 1h at RT; phalloidin staining was included in this  
387 step AF594 or AF633 (Molecular Probes, ThermoFisher) for actin visualization. Cells were  
388 washed and mounted in ProLong Gold Antifade Reagent with DAPI (Cell Signaling Technology,  
389 USA) for nuclear staining and maintained at 4°C. Lysosome was stained with LysoTracker™ Red  
390 DND-99 (ThermoFischer) following the manufacturer's instructions.

391

### 392 **Immunofluorescence microscopy**

393 Confocal imaging was carried out at the Confocal Microscopy Facility of the University of Maryland  
394 School of Medicine using a Nikon W1 spinning disk confocal microscope running NIS-Elements  
395 imaging software (Nikon). Images were captured with a 40X or 60X oil objective and settings were  
396 adjusted to optimize signal. Immunofluorescence imaging (Fig. 3f) was carried out using EVOS  
397 FL Imaging systems (fluorescent microscope) at 40X objective lens. Images were collated using  
398 FIJI/ImageJ (NIH). Signal processing was applied equally across the entire image. Actin channel  
399 was arranged to white-grey color for contrast purpose.

400

## 401 **Flow cytometry**

402 Cell phenotype was determined using the following human specific monoclonal antibodies from  
403 BD Pharmingen: HI98 (anti-CD15, FITC-conjugated), M5E2 (anti-CD14, APC-conjugated), 3G8  
404 (anti-CD16, PE/Cy7-conjugated), D53-1473 (anti-CD88, BV421-conjugated), and BioLegend:  
405 TS1/18 (anti-CD18, PE/Cy7-conjugated), ICRF44 (anti-CD11b, BV421-conjugated), 5E8/CXCR2  
406 (anti-CD182, APC-conjugated), CC2C6 (anti-CD47, PE/Cy7-conjugated), HA58 (anti-CD54,  
407 APC-conjugated), G10F5 (anti-CD66b, Pacific Blue-conjugated). PMN were blocked with 2%  
408 normal mouse serum (ThermoFisher) for 15 min at 4°C. After washing, cells were resuspended  
409 in FACS buffer (PBS containing 0.5% BSA and 2 mM EDTA; all Sigma-Aldrich) and 100  $\mu$ l of  
410 equal number of cells were dispensed in several tubes and stained with antibodies for 30 min at  
411 4°C. Antibodies were used diluted 1:2 – 1:1,000; optional amount was determined by in-house  
412 titration. Cells were washed in FACS buffer and either analyzed or fixed in 4% PFA for 15 min at  
413 4°C and analyzed the next day. Marker expression was analyzed in a Guava 8HT using Guava  
414 ExpressPro software (Luminex, USA) or BD LSRII using FACSDiva software (BD Biosciences,  
415 USA) and analyzed with FlowJo software (v10, Tree Star).

416

## 417 **Cytokine and chemokine measurements**

418 Cytokines and chemokines were measured by electrochemiluminescence microarray using  
419 commercial assays (Meso Scale Diagnostic, USA) following the manufacturer's instructions. IFN-  
420  $\gamma$ , IL-1 $\beta$ , IL-6, IL-10, IL-12p70, TNF- $\alpha$ , MCP-1, TGF- $\beta$ 1, and IL-8 were reported as total amount  
421 (pg) contained in the entire volume of apical (100  $\mu$ l) and basolateral (600  $\mu$ l) culture supernatants.

422

## 423 **Statistical analysis**

424 Statistical significances were calculated using the Student's *t*-test unpaired, one-way or two-way  
425 analysis of variance (ANOVA) with Tukey's post-test as appropriate, using Prism software v7.02

426 (GraphPad, San Diego, CA). Treatment comparisons included at least three replicates and three  
427 independent experiments. Differences were considered statistically significant at  $p$ -value  $\leq 0.05$ .  
428 Exact  $p$  values are indicated in each Figure. Results are expressed as mean  $\pm$  standard error of  
429 mean (sem).

430

### 431 **Acknowledgements**

432 The authors want to thank Dr. Mark Donowitz, for critical reading of the manuscript and Robin  
433 Barnes and Nancy Greenberg, Clinical Research Nurses at University of Maryland, for their  
434 assistance in obtaining peripheral blood samples. The authors would like to acknowledge the  
435 Integrated Physiology Core of the Hopkins Conte Digestive Disease Basic and Translational  
436 Research Core Center (NIH P30 DK-089502 to N.C.Z.) for providing human enteroids and growth  
437 factor conditioned media and the University of Maryland School of Medicine Center for Innovative  
438 Biomedical Resources, Flow Cytometry Shared Service. This work was supported by NIH/NIAID  
439 P01AI125181 Immunology and Enteroid Cores, and 1R01AI117734-01 to M.F.P.

440

### 441 **Author Contributions**

442 J.M.L-D. designed and performed experiments, conducted data analyses and interpretation. M.D.  
443 provided initial assistance with enteroid monolayers. N.C.Z. and M.F.P. participated in  
444 experimental design, data analyses and interpretation, and supervised the study. J.M.L-D. and  
445 M.F.P. wrote the manuscript. All authors edited the manuscript.

446

### 447 **Disclosures**

448 The authors have no financial conflicts of interest.

449

450 **References**

- 451 1. Peterson, L. W. & Artis, D. Intestinal epithelial cells: regulators of barrier function and  
452 immune homeostasis. *Nat. Rev. Immunol.* **14**, 141-153 (2014).
- 453 2. Mestas, J. & Hughes, C. C. Of mice and not men: differences between mouse and human  
454 immunology. *J. Immunol.* **172**, 2731-2738 (2004).
- 455 3. Gibbons, D. L. & Spencer, J. Mouse and human intestinal immunity: same ballpark,  
456 different players; different rules, same score. *Mucosal Immunol.* **4**, 148-157 (2011).
- 457 4. Barker, N., van Es, J. H., Kuipers, J., Kujala, P., van den Born, M., Cozijnsen, M. *et al.*  
458 Identification of stem cells in small intestine and colon by marker gene *Lgr5*. *Nature* **449**,  
459 1003-1007 (2007).
- 460 5. Zhang, Y. G., Wu, S., Xia, Y. & Sun, J. Salmonella-infected crypt-derived intestinal organoid  
461 culture system for host-bacterial interactions. *Physiol. Rep.* **2**, e12147 (2014).
- 462 6. Huang, J. Y., Sweeney, E. G., Sigal, M., Zhang, H. C., Remington, S. J., Cantrell, M. A. *et al.*  
463 Chemodetection and destruction of host urea allows *Helicobacter pylori* to locate the  
464 epithelium. *Cell Host Microbe* **18**, 147-156 (2015).
- 465 7. Co, J. Y., Margalef-Catala, M., Li, X., Mah, A. T., Kuo, C. J., Monack, D. M. *et al.* Controlling  
466 epithelial polarity: A human enteroid model for host-pathogen interactions. *Cell Rep.* **26**,  
467 2509-2520.e2504 (2019).
- 468 8. Foulke-Abel, J., In, J., Kovbasnjuk, O., Zachos, N. C., Ettayebi, K., Blutt, S. E. *et al.* Human  
469 enteroids as an ex-vivo model of host-pathogen interactions in the gastrointestinal tract.  
470 *Exp. Biol. Med. (Maywood)* **239**, 1124-1134 (2014).
- 471 9. In, J., Foulke-Abel, J., Zachos, N. C., Hansen, A. M., Kaper, J. B., Bernstein, H. D. *et al.*  
472 Enterohemorrhagic *Escherichia coli* reduce mucus and intermicrovillar bridges in human  
473 stem cell-derived colonoids. *Cell. Mol. Gastroenterol. Hepatol.* **2**, 48-62 e43 (2016).
- 474 10. Rajan, A., Vela, L., Zeng, X. L., Yu, X., Shroyer, N., Blutt, S. E. *et al.* Novel segment- and  
475 host-specific patterns of Enteroaggregative *Escherichia coli* adherence to human  
476 intestinal enteroids. *mBio.* **9**, e02419-02417 (2018).
- 477 11. In, J. G., Foulke-Abel, J., Estes, M. K., Zachos, N. C., Kovbasnjuk, O. & Donowitz, M. Human  
478 mini-guts: new insights into intestinal physiology and host-pathogen interactions. *Nat.*  
479 *Rev. Gastroenterol. Hepatol.* **13**, 633-642 (2016).
- 480 12. Noel, G., Baetz, N. W., Staab, J. F., Donowitz, M., Kovbasnjuk, O., Pasetti, M. F. *et al.* A  
481 primary human macrophage-enteroid co-culture model to investigate mucosal gut  
482 physiology and host-pathogen interactions. *Sci. Rep.* **7**, 45270 (2017).
- 483 13. Noel, G., Doucet, M., Nataro, J. P., Kaper, J. B., Zachos, N. C. & Pasetti, M. F.  
484 Enterotoxigenic *Escherichia coli* is phagocytosed by macrophages underlying villus-like  
485 intestinal epithelial cells: modeling ex vivo innate immune defenses of the human gut.  
486 *Gut Microbes* **9**, 382-389 (2018).
- 487 14. Sansonetti, P. J., Arondel, J., Cantey, J. R., Prevost, M. C. & Huerre, M. Infection of rabbit  
488 Peyer's patches by *Shigella flexneri*: effect of adhesive or invasive bacterial phenotypes  
489 on follicle-associated epithelium. *Infect. Immun.* **64**, 2752-2764 (1996).
- 490 15. Gustafson, M. P., Lin, Y., Maas, M. L., Van Keulen, V. P., Johnston, P. B., Peikert, T. *et al.* A  
491 method for identification and analysis of non-overlapping myeloid immunophenotypes in  
492 humans. *PLoS One* **10**, e0121546 (2015).

- 493 16. Metzemaekers, M., Vandendriessche, S., Berghmans, N., Gouwy, M. & Proost, P.  
494 Truncation of CXCL8 to CXCL8(9-77) enhances actin polymerization and in vivo migration  
495 of neutrophils. *J. Leukoc. Biol.* **107**, 1167-1173 (2020).
- 496 17. Fournier, B. M. & Parkos, C. A. The role of neutrophils during intestinal inflammation.  
497 *Mucosal Immunol.* **5**, 354-366 (2012).
- 498 18. Lekstrom-Himes, J. A. & Gallin, J. I. Immunodeficiency diseases caused by defects in  
499 phagocytes. *N. Engl. J. Med.* **343**, 1703-1714 (2000).
- 500 19. Wortmann, S. B., Van Hove, J. L. K., Derks, T. G. J., Chevalier, N., Knight, V., Koller, A. *et al.*  
501 Treating neutropenia and neutrophil dysfunction in glycogen storage disease IB with an  
502 SGLT2-inhibitor. *Blood*, 2019004465 (2020).
- 503 20. Blikslager, A. T., Moeser, A. J., Gookin, J. L., Jones, S. L. & Odle, J. Restoration of barrier  
504 function in injured intestinal mucosa. *Physiol. Rev.* **87**, 545-564 (2007).
- 505 21. Sullivan, D. P., Bui, T., Muller, W. A., Butin-Israeli, V. & Sumagin, R. In vivo imaging reveals  
506 unique neutrophil transendothelial migration patterns in inflamed intestines. *Mucosal*  
507 *Immunol.* **11**, 1571-1581 (2018).
- 508 22. Lammermann, T., Afonso, P. V., Angermann, B. R., Wang, J. M., Kastentmuller, W., Parent,  
509 C. A. *et al.* Neutrophil swarms require LTB4 and integrins at sites of cell death in vivo.  
510 *Nature* **498**, 371-375 (2013).
- 511 23. Uderhardt, S., Martins, A. J., Tsang, J. S., Lammermann, T. & Germain, R. N. Resident  
512 macrophages cloak tissue microlesions to prevent neutrophil-driven inflammatory  
513 damage. *Cell* **177**, 541-555 e517 (2019).
- 514 24. Sumagin, R., Robin, A. Z., Nusrat, A. & Parkos, C. A. Transmigrated neutrophils in the  
515 intestinal lumen engage ICAM-1 to regulate the epithelial barrier and neutrophil  
516 recruitment. *Mucosal Immunol.* **7**, 905-915 (2014).
- 517 25. Parkos, C. A., Delp, C., Arnaout, M. A. & Madara, J. L. Neutrophil migration across a  
518 cultured intestinal epithelium. Dependence on a CD11b/CD18-mediated event and  
519 enhanced efficiency in physiological direction. *J. Clin. Invest.* **88**, 1605-1612 (1991).
- 520 26. Brazil, J. C., Liu, R., Sumagin, R., Kolegraff, K. N., Nusrat, A., Cummings, R. D. *et al.* alpha3/4  
521 Fucosyltransferase 3-dependent synthesis of Sialyl Lewis A on CD44 variant containing  
522 exon 6 mediates polymorphonuclear leukocyte detachment from intestinal epithelium  
523 during transepithelial migration. *J. Immunol.* **191**, 4804-4817 (2013).
- 524 27. Flemming, S., Luissint, A. C., Nusrat, A. & Parkos, C. A. Analysis of leukocyte transepithelial  
525 migration using an in vivo murine colonic loop model. *JCI Insight* **3**, e99722 (2018).
- 526 28. Masoodi, I., Kochhar, R., Dutta, U., Vaishnavi, C., Prasad, K. K., Vaiphei, K. *et al.* Evaluation  
527 of fecal myeloperoxidase as a biomarker of disease activity and severity in ulcerative  
528 colitis. *Dig. Dis. Sci.* **57**, 1336-1340 (2012).
- 529 29. Kolaczowska, E. & Kubes, P. Neutrophil recruitment and function in health and  
530 inflammation. *Nat. Rev. Immunol.* **13**, 159-175 (2013).
- 531 30. Grunwell, J. R., Giacalone, V. D., Stephenson, S., Margaroli, C., Dobosh, B. S., Brown, M.  
532 R. *et al.* Neutrophil dysfunction in the airways of children with acute respiratory failure  
533 due to lower respiratory tract viral and bacterial coinfections. *Sci. Rep.* **9**, 2874 (2019).
- 534 31. Svedberg, F. R., Brown, S. L., Krauss, M. Z., Campbell, L., Sharpe, C., Clausen, M. *et al.* The  
535 lung environment controls alveolar macrophage metabolism and responsiveness in type  
536 2 inflammation. *Nat. Immunol.* **20**, 571-580 (2019).

- 537 32. Vainer, B., Nielsen, O. H. & Horn, T. Comparative studies of the colonic in situ expression  
538 of intercellular adhesion molecules (ICAM-1, -2, and -3), beta2 integrins (LFA-1, Mac-1,  
539 and p150,95), and PECAM-1 in ulcerative colitis and Crohn's disease. *Am. J. Surg. Pathol.*  
540 **24**, 1115-1124 (2000).
- 541 33. Liu, Y., Merlin, D., Burst, S. L., Pochet, M., Madara, J. L. & Parkos, C. A. The role of CD47 in  
542 neutrophil transmigration. Increased rate of migration correlates with increased cell  
543 surface expression of CD47. *J. Biol. Chem.* **276**, 40156-40166 (2001).
- 544 34. Parkos, C. A., Colgan, S. P., Liang, T. W., Nusrat, A., Bacarra, A. E., Carnes, D. K. *et al.* CD47  
545 mediates post-adhesive events required for neutrophil migration across polarized  
546 intestinal epithelia. *J. Cell. Biol.* **132**, 437-450 (1996).
- 547 35. Golay, J., Valgardsdottir, R., Musaraj, G., Giupponi, D., Spinelli, O. & Introna, M. Human  
548 neutrophils express low levels of FcγRIIIA, which plays a role in PMN activation.  
549 *Blood* **133**, 1395-1405 (2019).
- 550 36. Teschner, D., Cholaszczynska, A., Ries, F., Beckert, H., Theobald, M., Grabbe, S. *et al.*  
551 CD11b regulates fungal outgrowth but not neutrophil recruitment in a mouse model of  
552 invasive pulmonary aspergillosis. *Front. Immunol.* **10**, 123 (2019).
- 553 37. Altstaedt, J., Kirchner, H. & Rink, L. Cytokine production of neutrophils is limited to  
554 interleukin-8. *Immunology* **89**, 563-568 (1996).
- 555 38. Andrews, C., McLean, M. H. & Durum, S. K. Cytokine tuning of intestinal epithelial  
556 function. *Front. Immunol.* **9**, 1270 (2018).
- 557 39. Ruder, B., Atreya, R. & Becker, C. Tumour necrosis factor alpha in intestinal homeostasis  
558 and gut related diseases. *Int. J. Mol. Sci.* **20**, (2019).
- 559 40. Ranganathan, S., Doucet, M., Grassel, C. L., Delaine-Elias, B., Zachos, N. C. & Barry, E. M.  
560 Evaluating *Shigella flexneri* pathogenesis in the human enteroid model. *Infect. Immun.* **87**,  
561 e00740-00718 (2019).
- 562 41. Koestler, B. J., Ward, C. M., Fisher, C. R., Rajan, A., Maresso, A. W. & Payne, S. M. Human  
563 intestinal enteroids as a model system of *Shigella* pathogenesis. *Infect. Immun.* **87**,  
564 e00733-00718 (2019).
- 565 42. Kotloff, K. L., Riddle, M. S., Platts-Mills, J. A., Pavlinac, P. & Zaidi, A. K. M. Shigellosis. *Lancet*  
566 **391**, 801-812 (2018).
- 567 43. Perdomo, O. J., Cavaillon, J. M., Huerre, M., Ohayon, H., Gounon, P. & Sansonetti, P. J.  
568 Acute inflammation causes epithelial invasion and mucosal destruction in experimental  
569 shigellosis. *J. Exp. Med.* **180**, 1307-1319 (1994).
- 570 44. Perdomo, J. J., Gounon, P. & Sansonetti, P. J. Polymorphonuclear leukocyte  
571 transmigration promotes invasion of colonic epithelial monolayer by *Shigella flexneri*. *J.*  
572 *Clin. Invest.* **93**, 633-643 (1994).
- 573 45. Coron, E., Flamant, M., Aubert, P., Wedel, T., Pedron, T., Letessier, E. *et al.*  
574 Characterisation of early mucosal and neuronal lesions following *Shigella flexneri*  
575 infection in human colon. *PLoS One* **4**, e4713 (2009).
- 576 46. Kuhn, K. A., Manieri, N. A., Liu, T. C. & Stappenbeck, T. S. IL-6 stimulates intestinal  
577 epithelial proliferation and repair after injury. *PLoS One* **9**, e114195 (2014).
- 578 47. Ye, D., Ma, I. & Ma, T. Y. Molecular mechanism of tumor necrosis factor-alpha modulation  
579 of intestinal epithelial tight junction barrier. *Am. J. Physiol. Gastrointest. Liver Physiol.* **290**,  
580 G496-504 (2006).



- 581 48. Sellge, G., Magalhaes, J. G., Konradt, C., Fritz, J. H., Salgado-Pabon, W., Eberl, G. *et al.* Th17  
582 cells are the dominant T cell subtype primed by *Shigella flexneri* mediating protective  
583 immunity. *J. Immunol.* **184**, 2076-2085 (2010).
- 584 49. Lindberg, F. P., Bullard, D. C., Caver, T. E., Gresham, H. D., Beaudet, A. L. & Brown, E. J.  
585 Decreased resistance to bacterial infection and granulocyte defects in IAP-deficient mice.  
586 *Science* **274**, 795-798 (1996).
- 587 50. Azcutia, V., Kelm, M., Luissint, A. C., Boerner, K., Flemming, S., Quiros, M. *et al.* Neutrophil  
588 expressed CD47 regulates CD11b/CD18-dependent neutrophil transepithelial migration  
589 in the intestine in vivo. *Mucosal Immunol.*, (2020).
- 590 51. Jaiswal, S., Jamieson, C. H., Pang, W. W., Park, C. Y., Chao, M. P., Majeti, R. *et al.* CD47 is  
591 upregulated on circulating hematopoietic stem cells and leukemia cells to avoid  
592 phagocytosis. *Cell* **138**, 271-285 (2009).
- 593 52. Zhang, Z., Jin, L., Champion, G., Seydel, K. B. & Stanley, S. L., Jr. *Shigella* infection in a SCID  
594 mouse-human intestinal xenograft model: role for neutrophils in containing bacterial  
595 dissemination in human intestine. *Infect. Immun.* **69**, 3240-3247 (2001).
- 596 53. Trevani, A. S., Andonegui, G., Giordano, M., Lopez, D. H., Gamberale, R., Minucci, F. *et al.*  
597 Extracellular acidification induces human neutrophil activation. *J. Immunol.* **162**, 4849-  
598 4857 (1999).
- 599 54. Sato, T., Stange, D. E., Ferrante, M., Vries, R. G., Van Es, J. H., Van den Brink, S. *et al.* Long-  
600 term expansion of epithelial organoids from human colon, adenoma, adenocarcinoma,  
601 and Barrett's epithelium. *Gastroenterology* **141**, 1762-1772 (2011).
- 602 55. In, J. G., Foulke-Abel, J., Clarke, E. & Kovbasnjuk, O. Human colonoid monolayers to study  
603 interactions between pathogens, commensals, and host intestinal epithelium. *J. Vis. Exp.*,  
604 (2019).
- 605 56. Parkos, C. A., Colgan, S. P., Delp, C., Arnaout, M. A. & Madara, J. L. Neutrophil migration  
606 across a cultured epithelial monolayer elicits a biphasic resistance response representing  
607 sequential effects on transcellular and paracellular pathways. *J. Cell. Biol.* **117**, 757-764  
608 (1992).
- 609 57. Brouwer, N., Dolman, K. M., van Houdt, M., Sta, M., Roos, D. & Kuijpers, T. W. Mannose-  
610 binding lectin (MBL) facilitates opsonophagocytosis of yeasts but not of bacteria despite  
611 MBL binding. *J. Immunol.* **180**, 4124-4132 (2008).
- 612 58. Chaka, W., Scharringa, J., Verheul, A. F., Verhoef, J., Van Strijp, A. G. & Hoepelman, I. M.  
613 Quantitative analysis of phagocytosis and killing of *Cryptococcus neoformans* by human  
614 peripheral blood mononuclear cells by flow cytometry. *Clin. Diagn. Lab. Immunol.* **2**, 753-  
615 759 (1995).
- 616  
617

618 **Figure legends**

619 **Figure 1. Establishment of a human PMN-enteroid co-culture.** (a) Process of PMN isolation  
620 from peripheral blood and May-Grünwald Giemsa image [left]. Representative dot plot of PMN  
621 phenotype [middle] and schematic representation PMN-enteroid co-culture model [right]. (b)  
622 Confocal XZ projection [top; right, magnification XY projection] and H&E [bottom] images of the  
623 PMN-enteroid co-culture. Confocal: DNA, blue; actin, white; CD16 (PMN), green; Transwell insert,  
624 dashed lines. Arrowheads indicate PMN seeded on the Transwell insert and at the base of the  
625 columnar epithelium. (c) Representative immunofluorescence confocal microscopy image [top,  
626 XY; bottom, XZ projections] showing transmigrating PMN within the epithelial cell monolayer.  
627 DNA, blue; CD16 (PMN), green; actin, white; Transwell insert, dashed line. (d) Number of PMN  
628 transmigrated to the apical compartment after 2h of incubation with enteroid monolayers. (e) TER  
629 of PMN-enteroid co-cultures at 2h. (f) Total amount of cytokines secreted into the apical and  
630 basolateral compartments after 2h of co-culture. (g) Numbers of PMN transmigrated to luminal  
631 compartment 2h after of apical treatment with rhIL-8. Blue shadow denotes mean  $\pm$  sem of data  
632 shown in (d); *p* value comparing (d) vs. (g). (h) TER of enteroid monolayers and PMN-enteroid  
633 co-culture apically treated with rhIL-8 for 2h. (d,e,g,h) Each dot represents the average from three  
634 replicate wells; data are shown as mean  $\pm$  sem from 3 independent experiments. (f) Data are  
635 shown as mean + sem from 3 independent experiments in triplicate. *p* values were calculated by  
636 Student's *t* test.

637

638 **Figure 2. Distinctive PMN phenotype in the human intestinal environment.** (a) Schematic  
639 representation of PMN in direct contact with epithelial cells (C) or in the basolateral media (BM).  
640 (b, c, d) Phenotype of freshly isolated PMN, PMN in C and BM determined by flow cytometry  
641 within 2h of co-culture. Each dot represents data collected from three replicate wells; data are  
642 shown as mean  $\pm$  sem from 3 independent experiments. *p* values were calculated by one-way-  
643 ANOVA with Tukey's post-test for multiple comparisons.



644

645 **Figure 3. Innate immune responses of human PMN to *S. flexneri*.** (a) Representative confocal  
646 microscopy image and histogram of *S. flexneri* 2a-FITC uptake by human PMN. Confocal image  
647 [left, XY projection]. DNA, blue; actin, red; *S. flexneri* 2a, green. Histograms of PMN harboring  
648 *Shigella*-FITC [middle] and percentage of phagocytosis at 10, 30 and 60 min post infection [left].  
649 Each dot represents the average from three replicates and PMN from 5 individual donors; data  
650 are shown as mean  $\pm$  sem from 3 independent experiments. (b) Extracellular *S. flexneri* 2a colony  
651 forming units (CFU) in PMN culture media at 10, 30 and 60 min post infection. Each dot represents  
652 the average from three replicates and PMN from 6 individual donors; data are shown as mean  $\pm$   
653 sem from 3 independent experiments. (a, b) *p* values were calculated by one-way ANOVA with  
654 Tukey's post-test for multiple comparisons. (c) PMN viability in the presence and absence of *S.*  
655 *flexneri* 2a. Data represents the average from three replicates and PMN from 3 individual donors;  
656 data are shown as mean  $\pm$  sem from 3 independent experiments. (d) PMN morphology before (0  
657 min) and after (30 min) exposure to *S. flexneri* 2a. (e) Confocal microscopy image [XY projection]  
658 of NET 30 min after exposure to *S. flexneri* 2a. DNA, blue; actin, red; *S. flexneri* 2a, green. (f)  
659 Immunofluorescence image showing *S. flexneri* 2a-FITC colocalization in PMN lysosome.  
660 Arrowheads indicate bacteria intracellularly and within the lysosome compartment. (g) Total  
661 amount of cytokines secreted into the culture media of PMN alone and PMN exposed to *S. flexneri*  
662 2a for 2h. Data are shown as mean  $\pm$  sem from 3 independent experiments in triplicate. (c, g) *p*  
663 values were calculated by Student's *t* test.

664

665 **Figure 4. *Shigella* infection of PMN-enteroid co-cultures.** (a) Numbers of PMN transmigrated  
666 to the apical compartment of enteroid monolayers exposed or not to *S. flexneri* 2a for 2h. (b)  
667 Confocal microscopy images [top, XY; bottom, XZ projections; right, magnification] of PMN-  
668 enteroid co-culture infected with *S. flexneri* 2a for 2h. CD16 (PMN), green; *S. flexneri* 2a, red;  
669 actin, white. Arrowheads indicate *S. flexneri* 2a. (c) CFU in the apical and basolateral media of

670 enteroid and PMN-enteroid co-cultures apically exposed to *S. flexneri* 2a for 2h. **(d)** TER of  
671 enteroid and PMN-enteroid co-cultures exposed to *S. flexneri* 2a for 2h. **(e)** Total amount of  
672 cytokines in the apical and basolateral media of PMN-enteroid co-cultures exposed or not to *S.*  
673 *flexneri* 2a for 2h. (a,c,d) Each dot represents the average from three replicate wells; data are  
674 shown as mean  $\pm$  sem from 3 (a, d) and 5 (c) independent experiments. *p* values were calculated  
675 by Student's *t* test. (e) Data are shown as mean + sem from 3 independent experiments in  
676 triplicate. *p* values were calculated by Student's *t* test.

677

678 **Figure 5. Immune phenotype of PMN co-cultured with epithelial cells and exposed to**  
679 ***Shigella*. (a, b, c)** Cell surface expression of CD15, CD16, CD11b, CD18, CD88, CD66b, CD47,  
680 and CD182 on PMN in the enteroid co-culture exposed or not to *S. flexneri* 2a for 2h. Each dot  
681 represents data collected from three replicate wells; data are shown as mean  $\pm$  sem from 3  
682 independent experiments. *p* values were calculated by Student's *t* test.

683

**Figure 1.**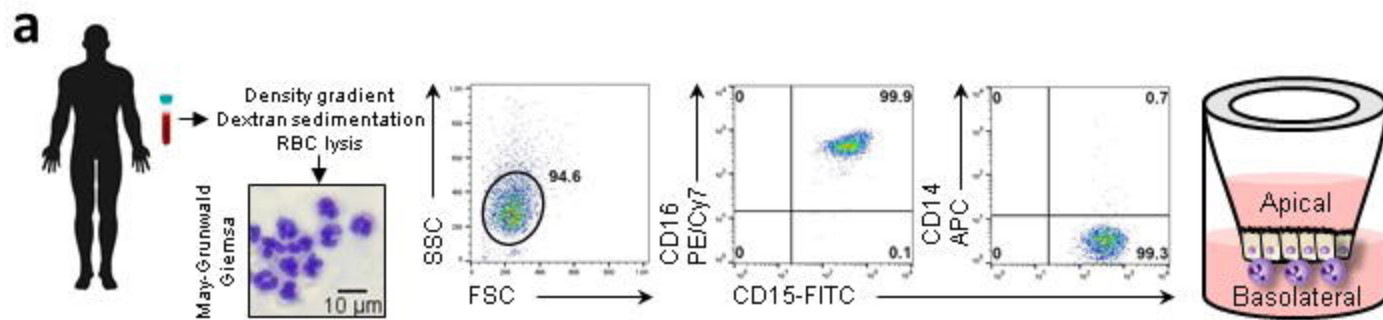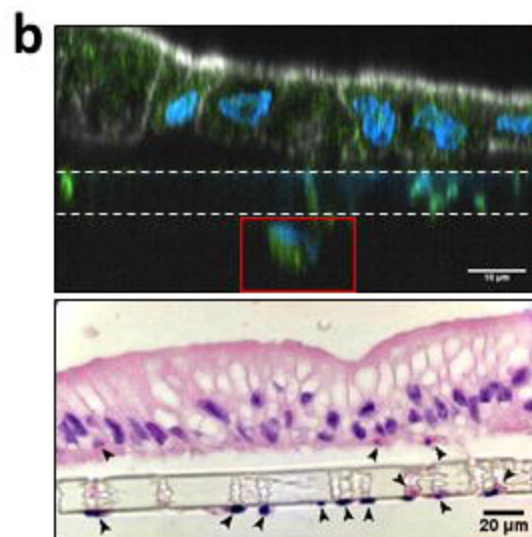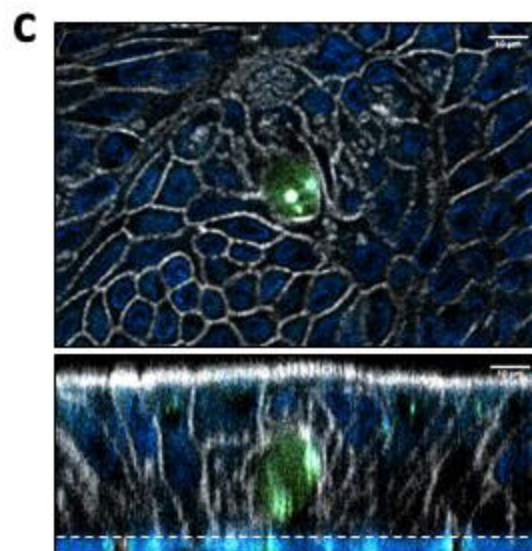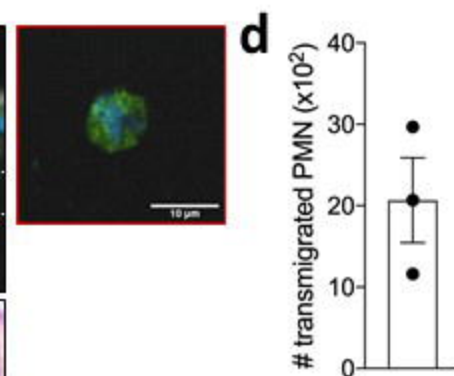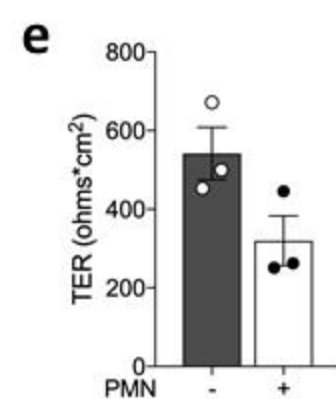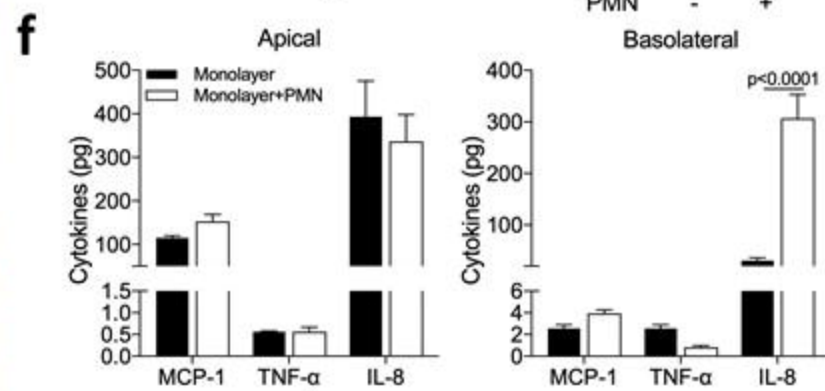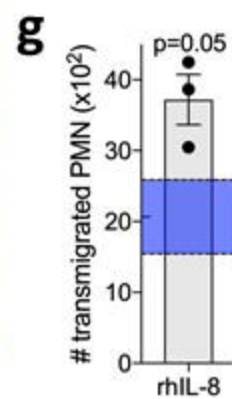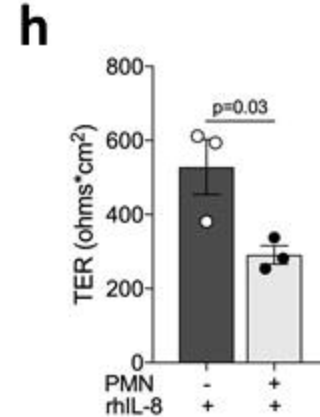

Figure 2.

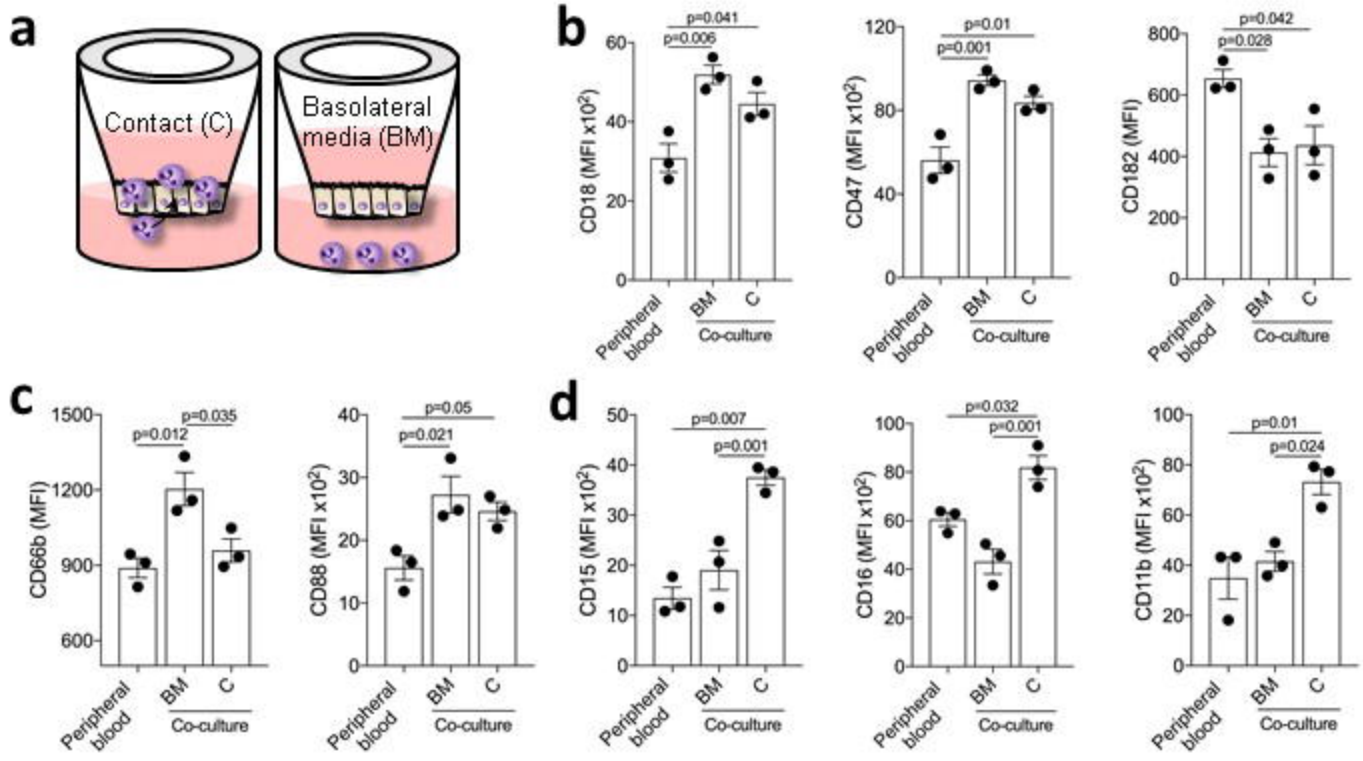

Figure 3.

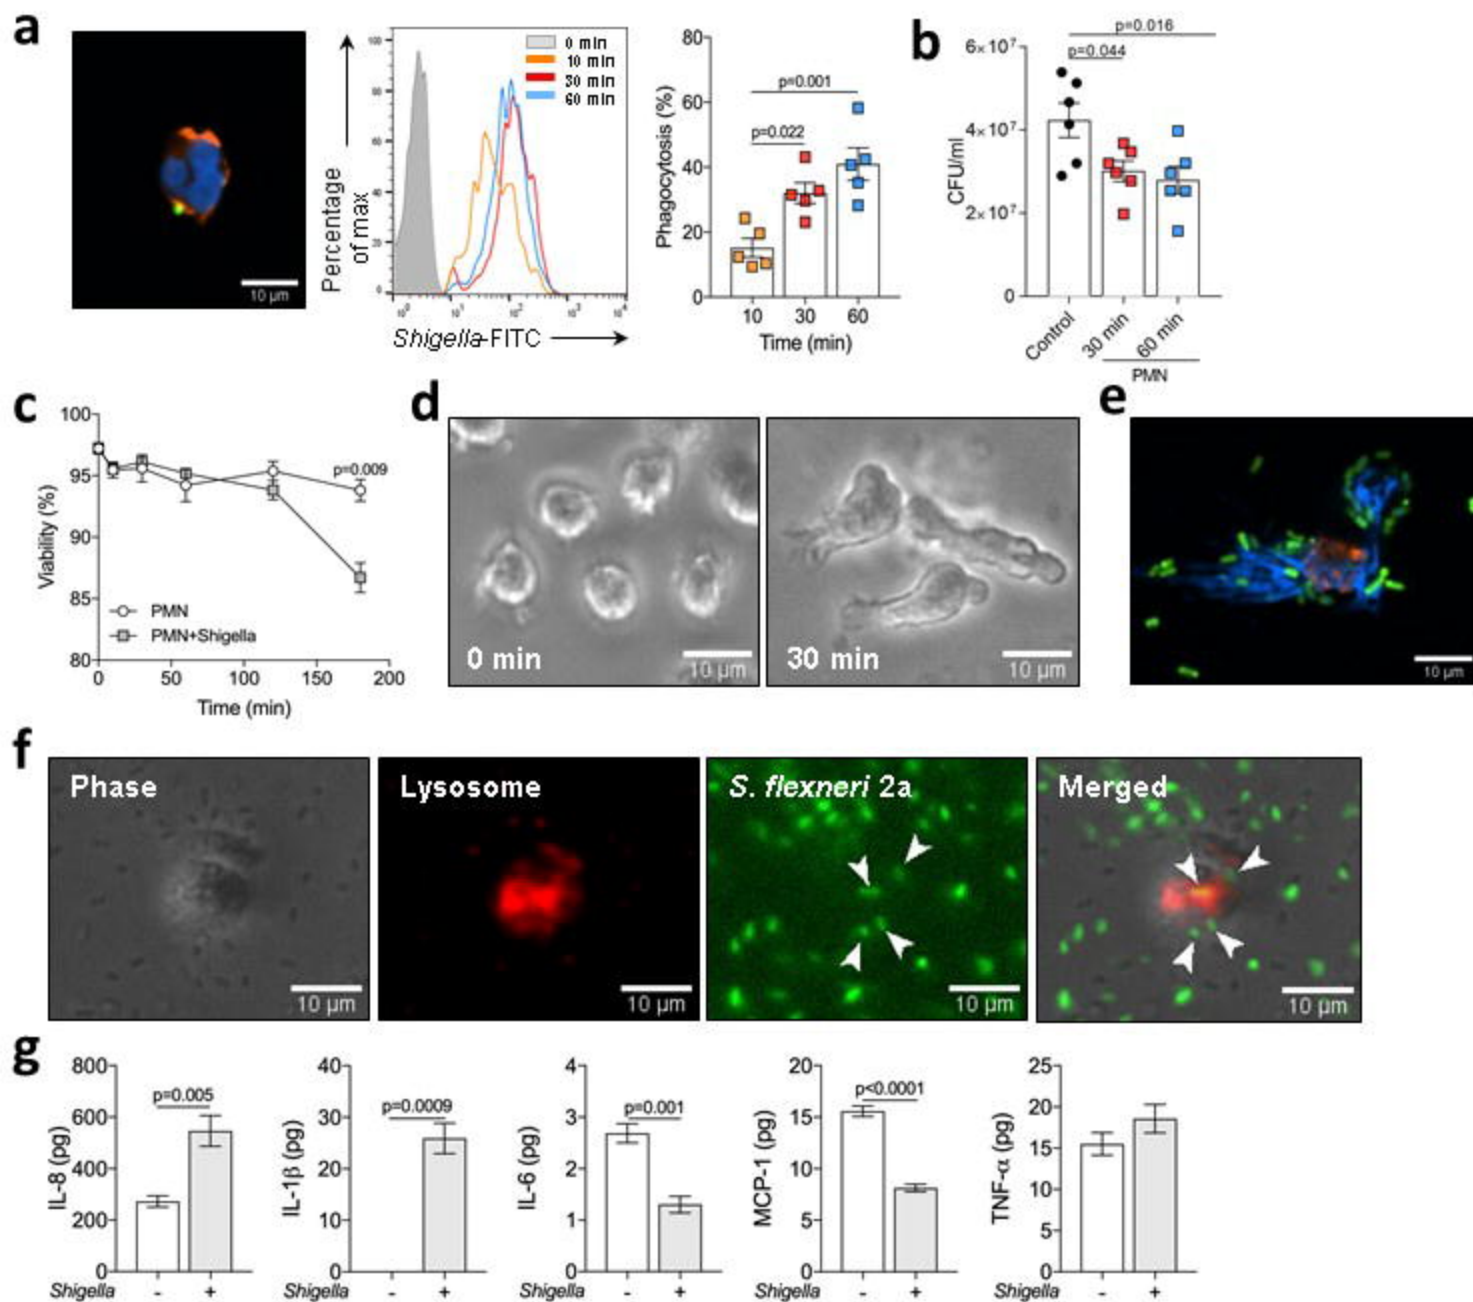



**Figure 4.**

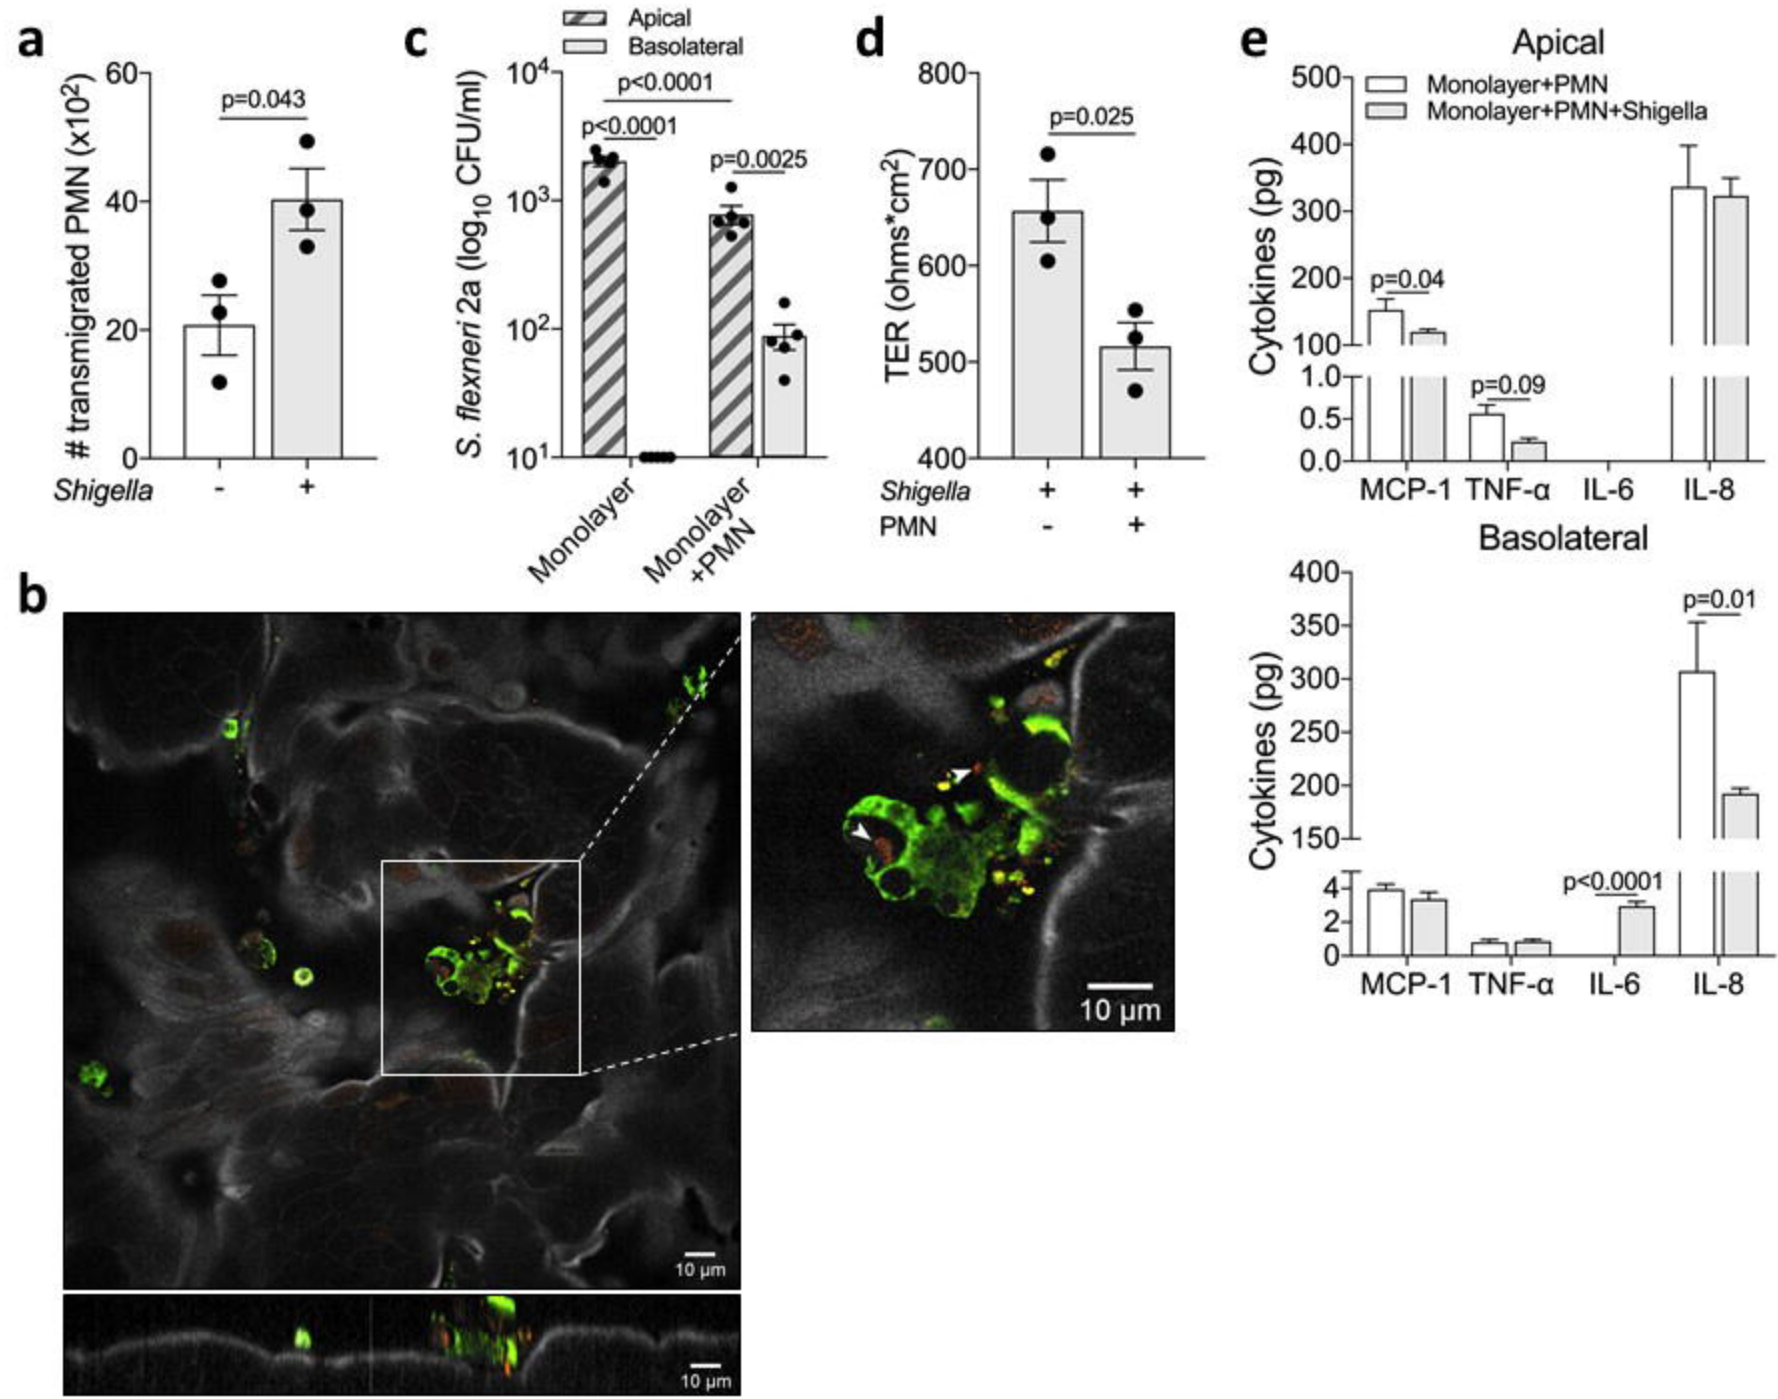

Figure 5.

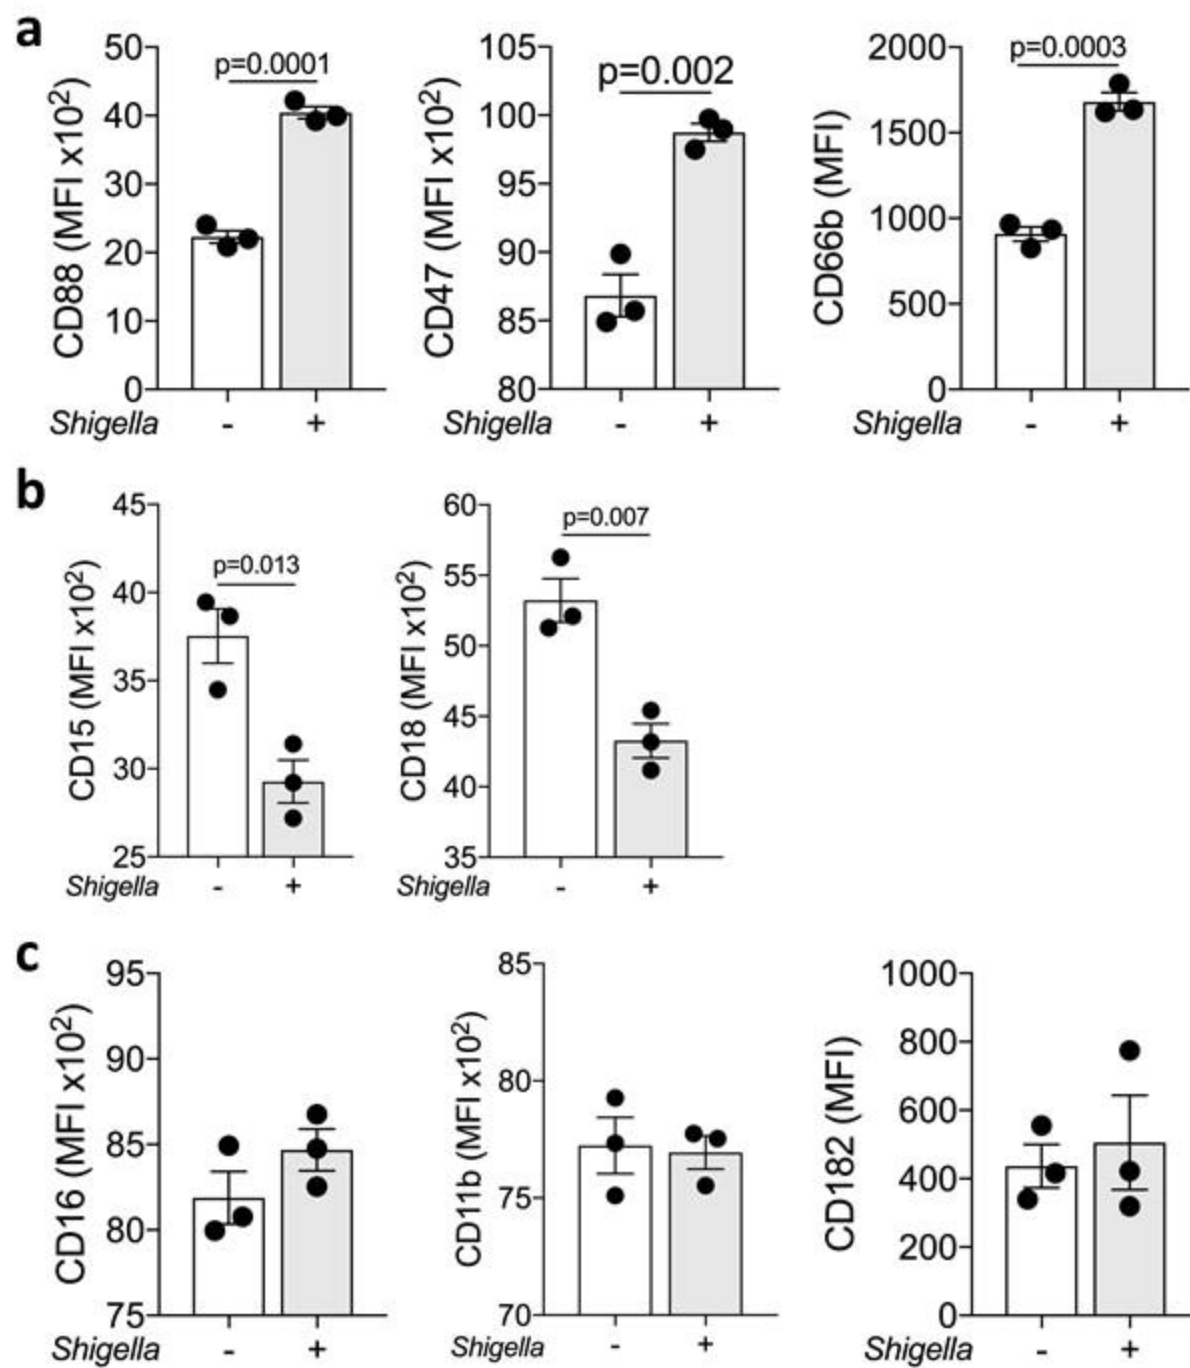

Source: http://biorxiv.org/content/10.1101/2020.09.03.281535v1.full.pdf
